# Supplementary material for: A facile strategy for the synthesis of graphene/V2O5 nanospheres and graphene/VN nanospheres derived from a single graphene oxide-wrapped VOx nanosphere precursor for hybrid supercapacitors
Source: Royal Society of Chemistry journal article supplement (doi:10.1039/c8ra05298k), 2018-01-01
Supplement: c8ra05298k1.pdf [file c8ra05298k1.pdf]

A Facile Strategy for the Synthesis of Graphene/V<sub>2</sub>O<sub>5</sub> Nanospheres and Graphene/VN  
Nanospheres Derived from a Single Graphene oxide-Wrapped VO<sub>x</sub> Nanospheres  
Precursor for Hybrid Supercapacitors†

*Wei Sun,<sup>a</sup> Xiujie Ji,<sup>a</sup> Guohua Gao,<sup>a,\*</sup> and Guangming Wu,<sup>a,\*</sup>*

<sup>a</sup>Shanghai Key Laboratory of Special Artificial Microstructure Materials and  
Technology, School of Physics and Science Engineering, Tongji University,  
Shanghai, 200092, PR China. Email: gao@tongji.edu.cn; wugm@tongji.edu.cn.

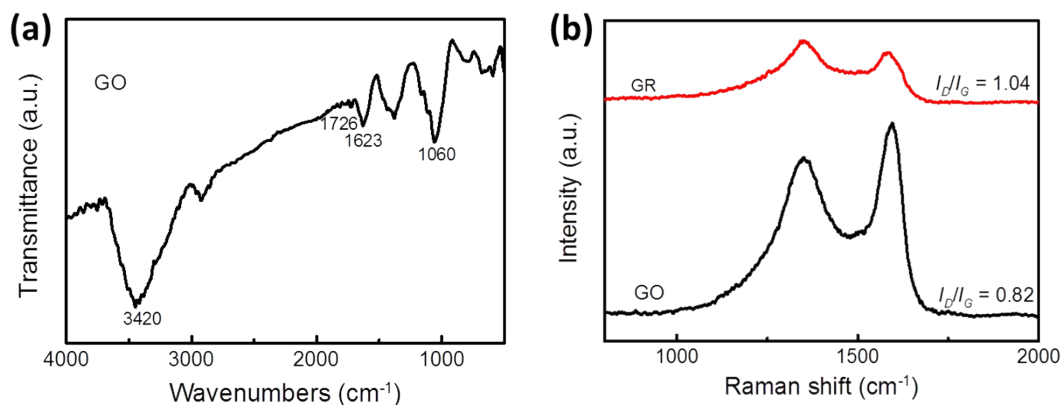

Fig. S1. (a) FTIR spectra of as-prepared GO; (b) the Raman spectra of as-prepared GO and GR.

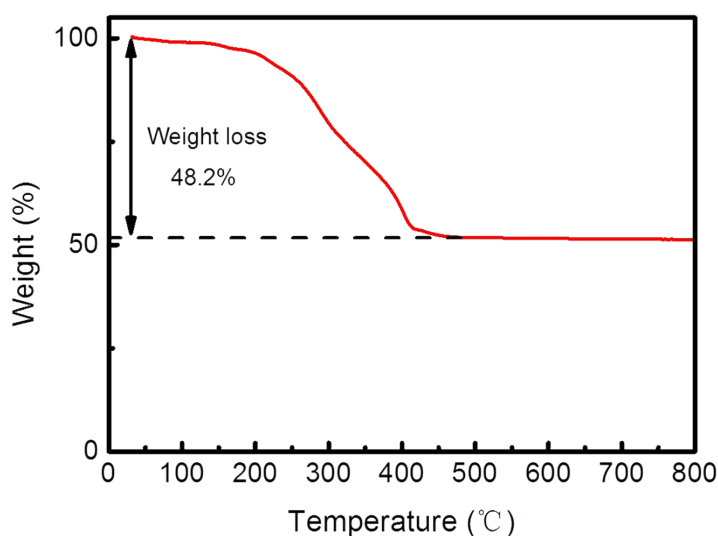

Fig. S2. TG of the GO-wrapped VO<sub>x</sub> NSP precursor under an air atmosphere.

Thermogravimetric analysis (TG) were carried out on a SDT Q600 over the temperature range from 30 °C to 800 °C at a heating rate of 10 °C min<sup>-1</sup> under air flow to explore the content of graphene in GO-wrapped VO<sub>x</sub> NSP precursor. The final weight loss of 48.2 % is due to the oxidative decomposition of graphene in air. The final electrode was prepared by mixing the active material, conductive carbon black, and PVDF with a mass ratio of 90 : 5 : 5. Thus the content of graphene in the final electrode is 43.3 %.

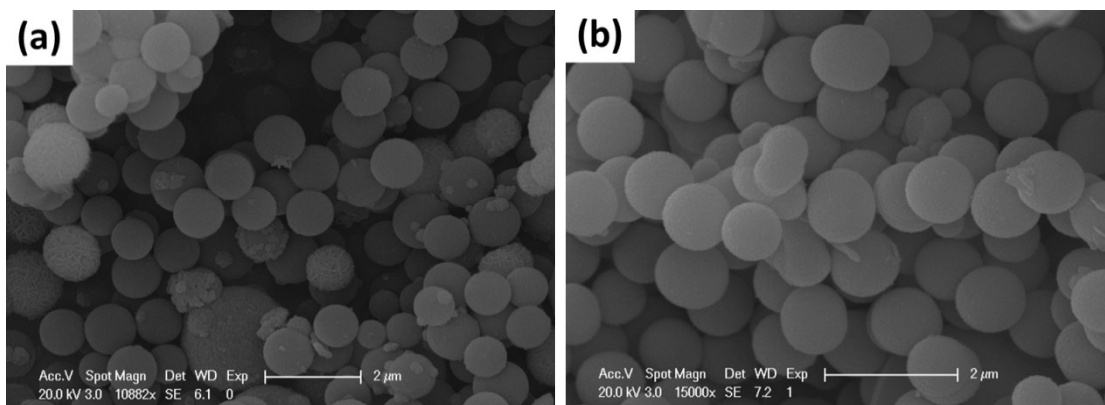

Fig. S3. (a) pure VN and (b) V<sub>2</sub>O<sub>5</sub> nanospheres.

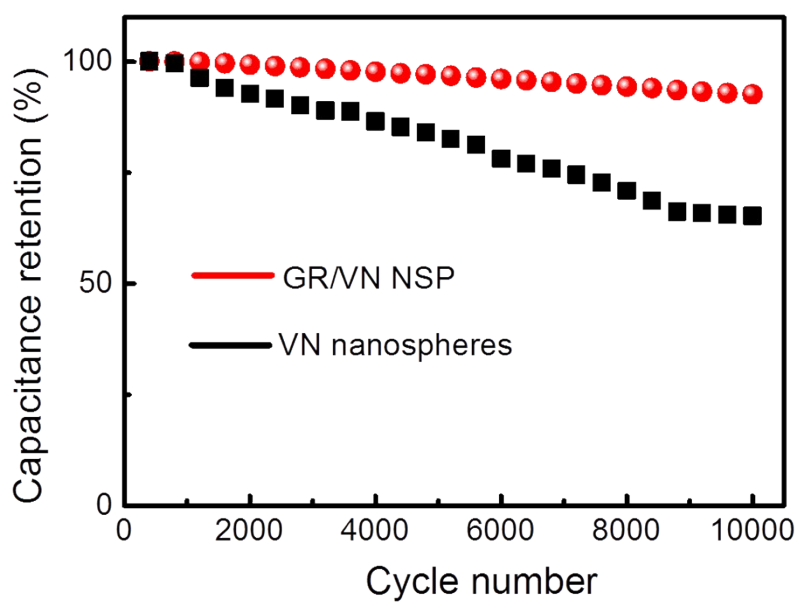

Fig. S4. Cycling performance of GR/VN NSP and pure VN nanospheres at current density of 10 A g<sup>-1</sup>.

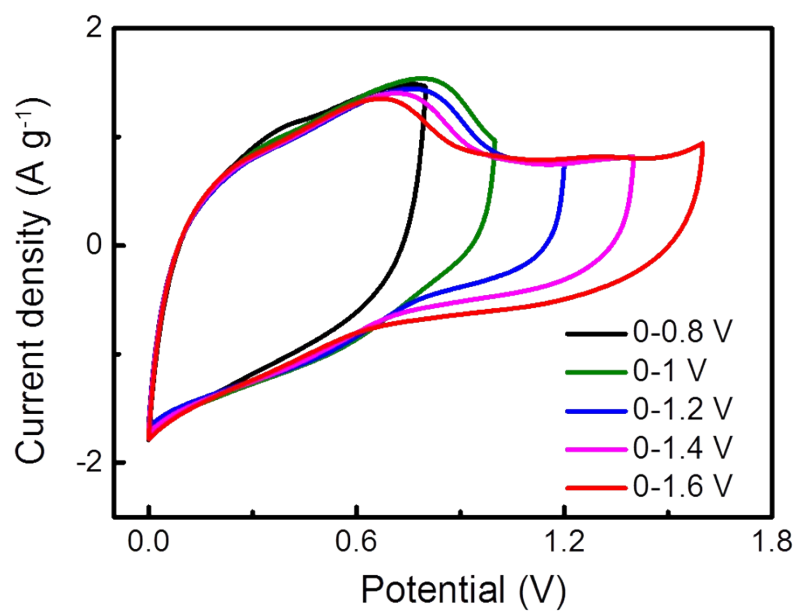

Fig. S5. CV curves measured at different operating voltages at a constant sweep rate of 15 mV s<sup>-1</sup>.

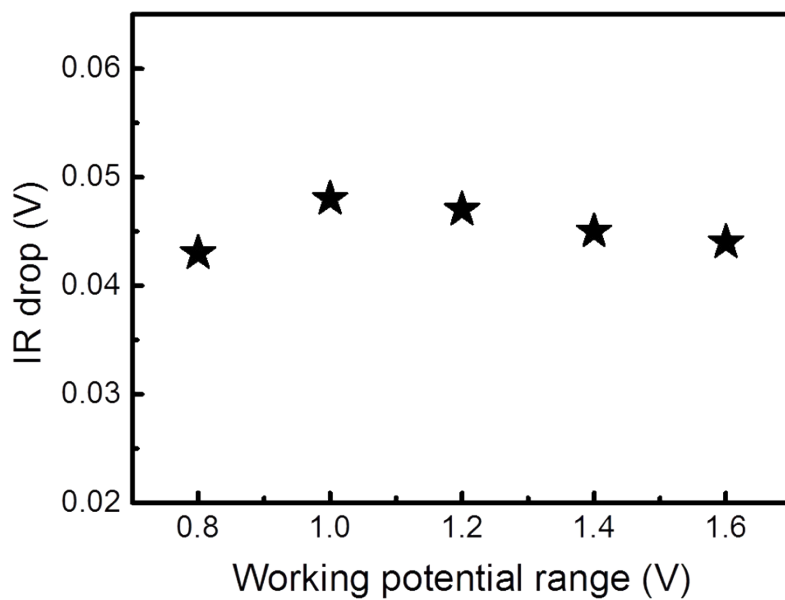

Fig. S6. The IR drop collected over different voltages from 0.8 to 1.6 V.

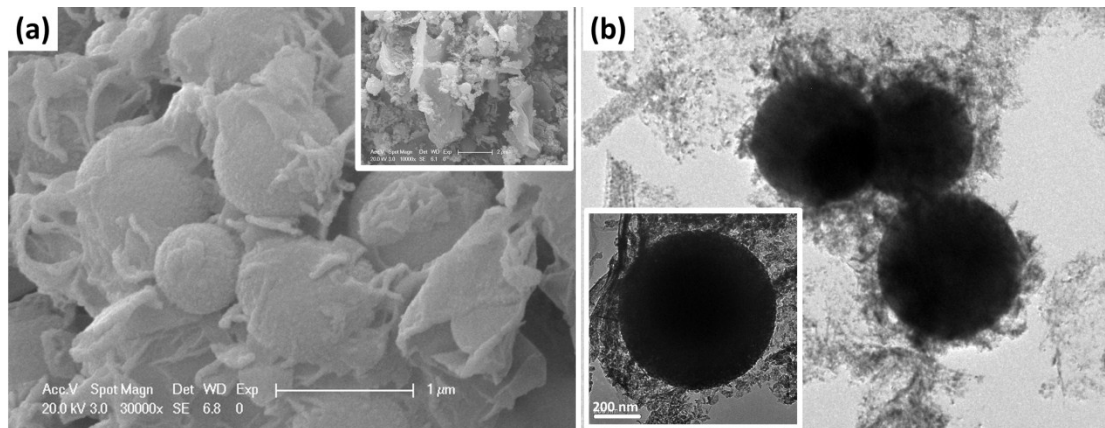

Figure S7. (a) SEM and TEM images of electrode materials after cycling for 7000 cycles.
